# Supplementary material for: Structural insight into activity enhancement and inhibition of H64A carbonic anhydrase II by imidazoles
Source: PubMed Central journal article supplement (PMC4062085; doi:10.1107/s2052252514004096), 2014-02-28

# IUCrJ

**Volume 1 (2014)**

**Supporting information for article:**

**Structural insight into activity enhancement and inhibition of H64A carbonic anhydrase II by imidazoles**

**Mayank Aggarwal, Bhargav Kondeti, Chingkuang Tu, C. Mark Maupin, David N. Silverman and Robert McKenna**

## Supporting Information

# Structural Insights into Activity Enhancement and Inhibition of H64A Carbonic Anhydrase II by Imidazoles

<sup>1</sup>Mayank Aggarwal, <sup>1</sup>Bhargav Kondeti, <sup>3</sup>Chingkuang Tu, <sup>2</sup>C. Mark Maupin, <sup>3</sup>David  
N. Silverman, and <sup>1</sup>Robert McKenna\*

<sup>1</sup>Department of Biochemistry and Molecular Biology, PO Box 100245, University of Florida, Gainesville,  
FL 32610

<sup>2</sup>Department of Chemical and Biological Engineering, 1500 Illinois St, Colorado School of Mines,  
Golden, CO 80401

<sup>3</sup>Department of Pharmacology and Therapeutics, PO Box 100247, University of Florida, Gainesville, FL  
32610

\*Corresponding author:

Email: [rmckenna@ufl.edu](mailto:rmckenna@ufl.edu)

Phone (office): 352-392-5696

**Keywords:** human carbonic anhydrase, H64A, activity enhancement, rescue, activation, imidazole.

## S1. Methods

### S1.1. Enzyme kinetics measurements

$^{18}\text{O}$  exchange assay was carried out to study the kinetics of the catalyzed reaction of the hydration and dehydration of  $\text{CO}_2$  and  $\text{HCO}_3^-$  -and how these small imidazoles (I, 1MI, 2MI and 4MI) affect the activity of H64A CA II. The pH values were chosen based on the  $\text{pK}_a$  of these imidazoles.

The method (Tu et al., 1989) relies on the depletion of  $^{18}\text{O}$  from species of  $\text{CO}_2$  as measured by membrane inlet mass spectrometry using an Extrel EXM-200 mass spectrometer (Pastorek et al., 1994). In the first stage of catalysis, the dehydration of labeled bicarbonate has a probability of labeling the active site with  $^{18}\text{O}$  (eq 1). In a following step, protonation of the zinc-bound  $^{18}\text{O}$ -labeled hydroxide results in the release of  $\text{H}_2^{18}\text{O}$  to the solvent and loss of signal from the isotopic species (eq 2).

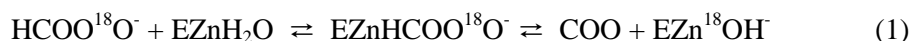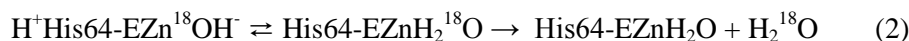

This approach yields two rates: The  $R_1$ , the rate of  $\text{CO}_2$  and  $\text{HCO}_3^-$  interconversion at chemical equilibrium (eq 1), as shown in Equation 3, and  $R_{\text{H}_2\text{O}}$ , the rate of release from the enzyme of water with labeled substrate oxygen (eq 2).

$$R_1/[E] = k_{\text{cat}}^{\text{ex}} [\text{CO}_2]/(K_{\text{eff}}^{\text{CO}_2} + [\text{CO}_2]) \quad (3)$$

In Equation 3,  $k_{\text{cat}}^{\text{ex}}$  is a rate constant for maximal interconversion of  $\text{CO}_2$  and bicarbonate,  $K_{\text{eff}}^{\text{CO}_2}$  represents a binding constant for the substrate to enzyme. The ratio  $k_{\text{cat}}^{\text{ex}}/K_{\text{eff}}^{\text{CO}_2}$  is considered equivalent in value to  $k_{\text{cat}}/K_M$  from steady state experiments, and is a measure of the successful binding and interconversion of substrate and product.

The second rate,  $R_{\text{H}_2\text{O}}$ , is the component of the  $^{18}\text{O}$  exchange that is dependent upon the donation of protons to the  $^{18}\text{O}$ -labeled zinc-bound hydroxide. In such a step, His64 as a predominant proton donor in the catalysis provides a proton (Equation 2). The value of  $R_{\text{H}_2\text{O}}$  can be determined and considered as the rate constant for proton transfer from His64 to the zinc-bound hydroxide according eq 4, in which  $k_B$

is the rate constant for proton transfer to the zinc-bound hydroxide and  $(K_a)_{\text{donor}}$  and  $(K_a)_{\text{ZnH}_2\text{O}}$  are ionization constants of the proton donor, His64, and zinc-bound water. The least-squares determination of kinetic constants of Equation 3 and Equation 4 was carried out using Enzfitter (Biosoft).

$$R_{\text{H}_2\text{O}}/[\text{E}] = k_B / ([1 + (K_a)_{\text{donor}} / [\text{H}^+]][1 + [\text{H}^+] / (K_a)_{\text{ZnH}_2\text{O}}]) \quad (4)$$

The uncatalyzed and carbonic-anhydrase-catalyzed exchanges of  $^{18}\text{O}$  between  $\text{CO}_2$  and water at chemical equilibrium were measured in the absence of buffer (to prevent interference from the second intermolecular proton transfer reaction) at a total substrate concentration of 25 mM and 25 °C.

## References

- Pastorek, J., Pastoreková, S., Callebaut, I., Mornon, J. P., Zelník, V., Opavský, R., Zat'ovicová, M., Liao, S., Portetelle, D., & Stanbridge, E. J. (1994). *Oncogene*, **9**, 2877–2888.
- Tu, C., Silverman, D. N., Forsman, C., Jonsson, B. H., & Lindskog, S. (1989). *Biochemistry (Mosc.)*, **28**, 7913–7918.

**Figure S1** (a) The effect of imidazole (I) on  $R_1/[E]$  (black) and  $R_{H_2O}/[E]$  (red) catalyzed by H64A CA II. (b) Crystal structure of H64A CA II in complex with imidazole, showing the site of inhibition (site 3). His64 from wt-CA II is superposed and shown as yellow sticks for orientation perspective.

(a)

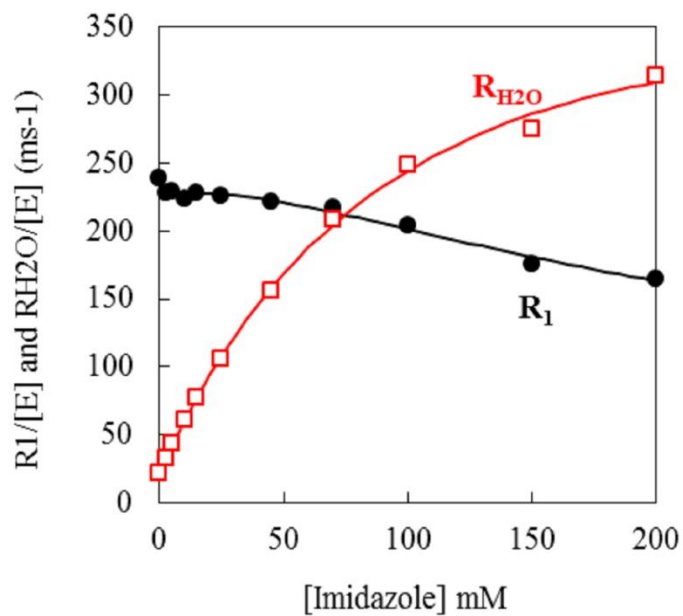

(b)

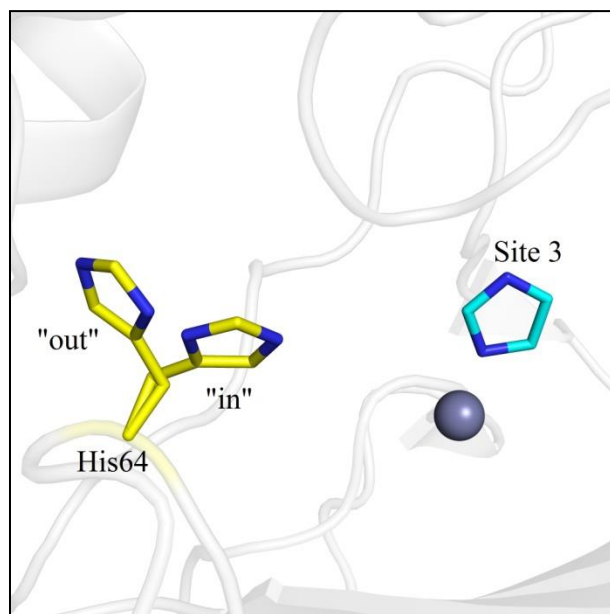

**Figure S2** (a) The effect of 2-methyl imidazole (2MI) on  $R_1/[E]$  (black) and  $R_{H_2O}/[E]$  (red) catalyzed by H64A CA II. (b) Crystal structure of H64A CA II in complex with 2-methyl imidazole, showing the sites of inhibition (site 3 and most likely also site 4). His64 from wt-CA II is superposed and shown as yellow sticks for orientation perspective.

(a)

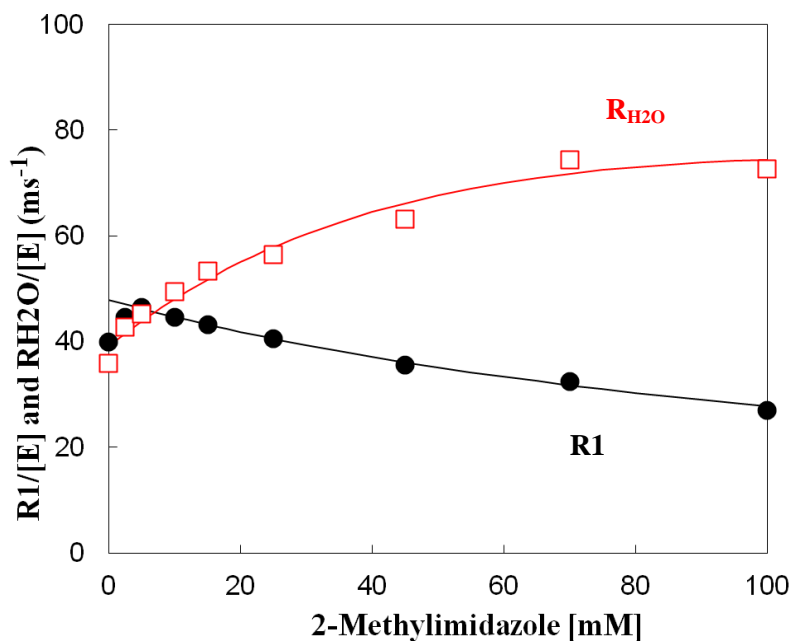

(b)

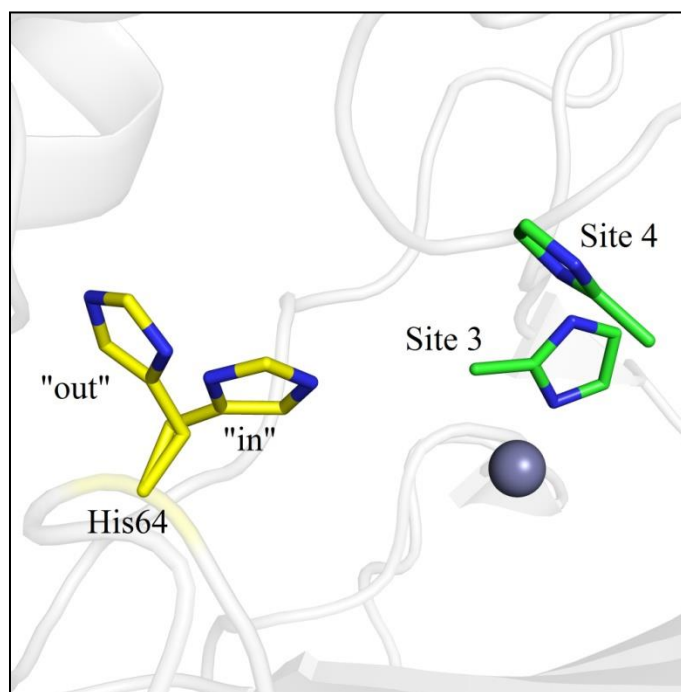

**Figure S3** The activity enhancement by exogenous proton donors of  $R_{H_2O}/[E]$  ( $s^{-1}$ ) catalyzed by H64A CA II. The proton donors were I (black) at pH 6.7, 1MI (red) at pH 7.3, 2MI (blue) at pH 8.1, and 4MI (green) at pH 7.7. The data were obtained at 25 °C using solutions maintained at a minimal ionic strength of 0.2 M by addition of  $Na_2SO_4$ .

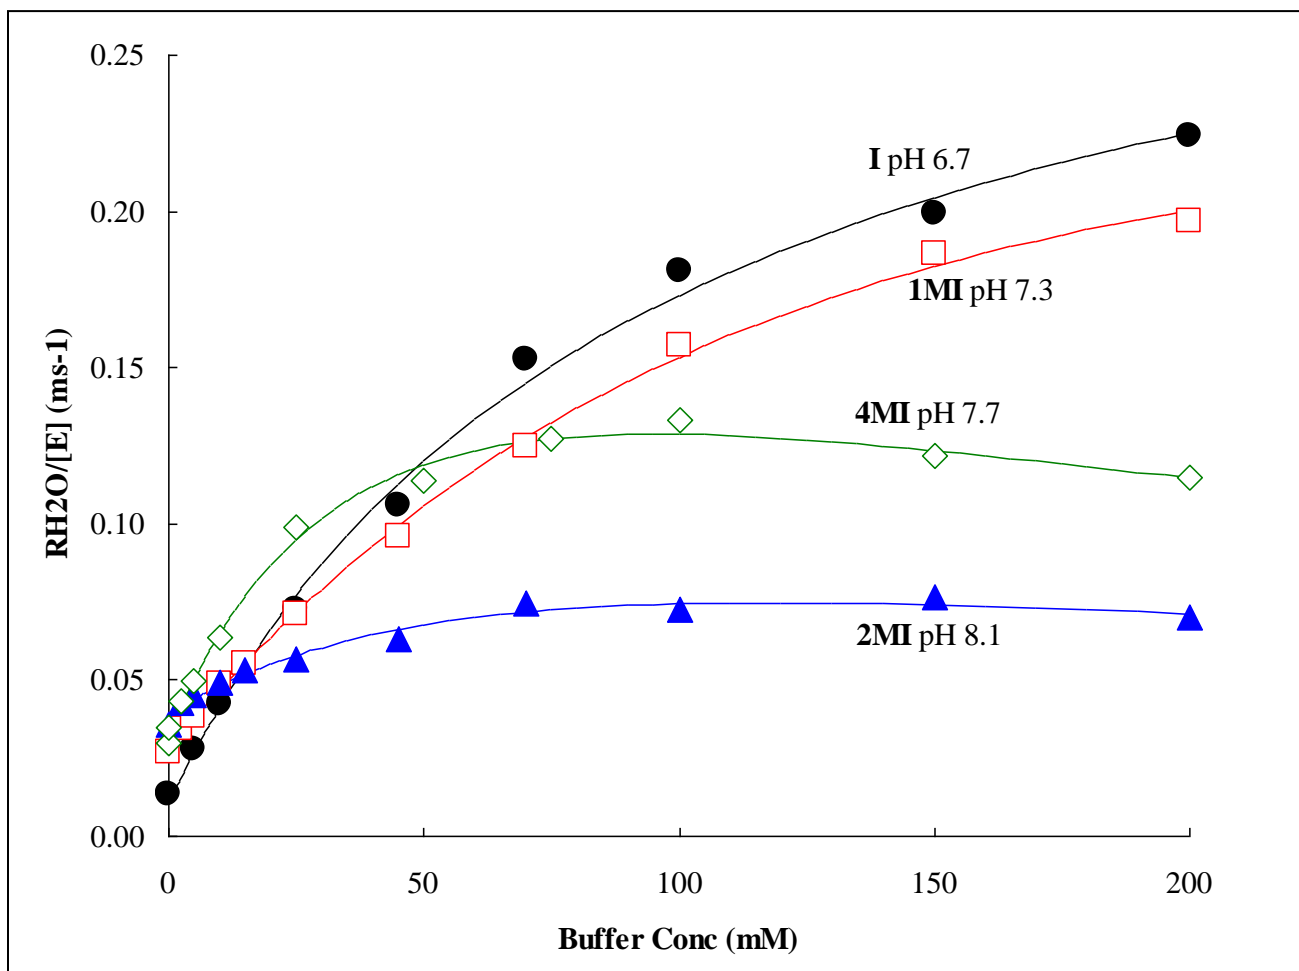

Supplement: m-01-00129-sup1.pdf [file m-01-00129-sup1.pdf]
